# Supplementary material
Source: PubMed Central journal article supplement (PMC7702021)
Supplement: NIHMS1645717-supplement-1.pdf [file NIHMS1645717-supplement-1.pdf]

511 **Supplemental Table 1. Radiation plan data for 0839 patients (n=54)**

|                 | Ipsilateral Lung – GTV | Contralateral Lung | Combined Lung-GTV | Heart | Esophagus |
|-----------------|------------------------|--------------------|-------------------|-------|-----------|
| V <sub>5</sub>  | 68.2                   | 44.3               | 56.5              |       |           |
| V <sub>10</sub> | 61.2                   | 20.6               | 41.1              | 25.3  |           |
| V <sub>20</sub> | 49.4                   | 3.8                | 28.8              | 16.5  |           |
| V <sub>30</sub> | 38.1                   | 0.7                | 20.9              | 11.3  |           |
| V <sub>45</sub> |                        |                    |                   | 5.1   |           |
| V <sub>60</sub> |                        |                    |                   | 0.7   |           |
| Mean Dose (Gy)  | 24.55                  | 6.15               | 16.10             |       | 23.25     |
| Max Dose (Gy)   |                        |                    |                   |       | 63.14     |

512 *GTV, gross tumor volume*
